# Supplementary material for: Bioavailability of Lutein from Marigold Flowers (Free vs. Ester Forms): A Randomised Cross-Over Study to Assess Serum Response and Visual Contrast Threshold in Adults
Source: MDPI journal article supplement (doi:10.3390/nu16101415), 2024-05-08

Figure S1. Correlations between serum lutein concentration ( $\mu\text{g/dL}$ , X axis) and CT (Y axis) in the total group (A), in the group aged 20-35 y (B) and 50-65 y (C). Line colours represent frequencies: high (red), medium (green) and low (blue).

### A) Total group

Basal, with glare

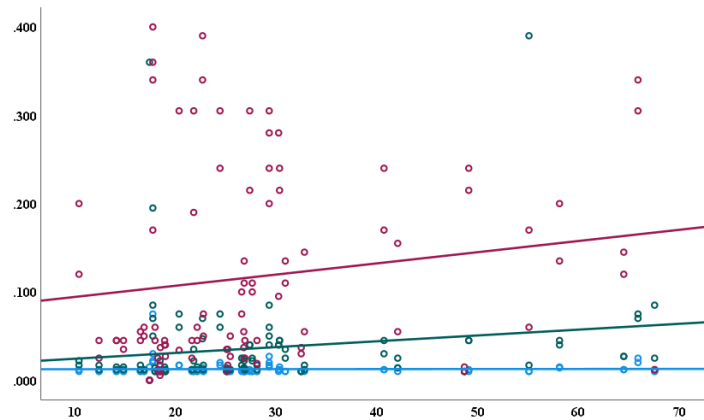

60 d, with glare

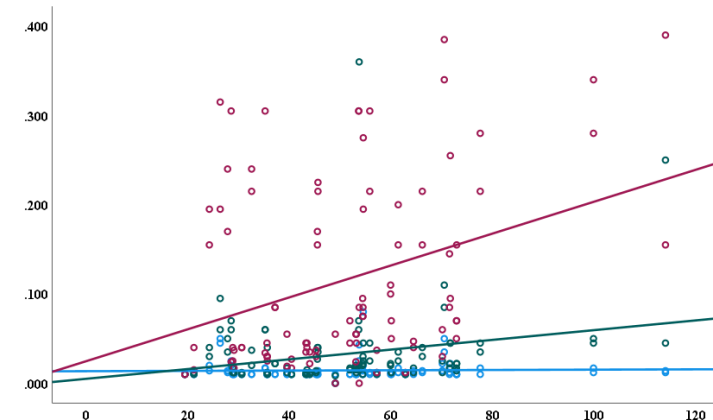

Basal, without glare

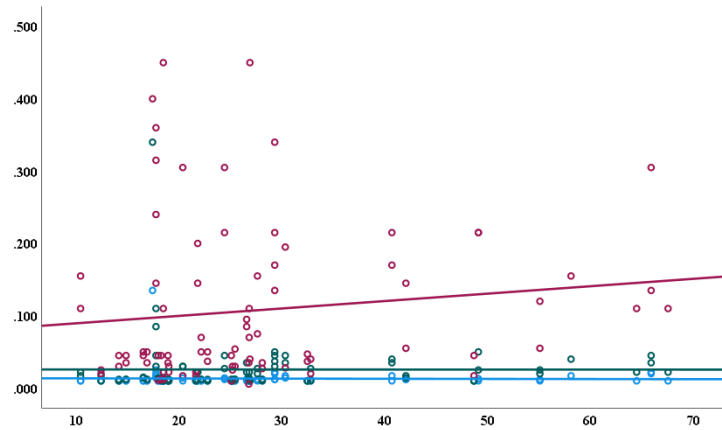

60 d, without glare

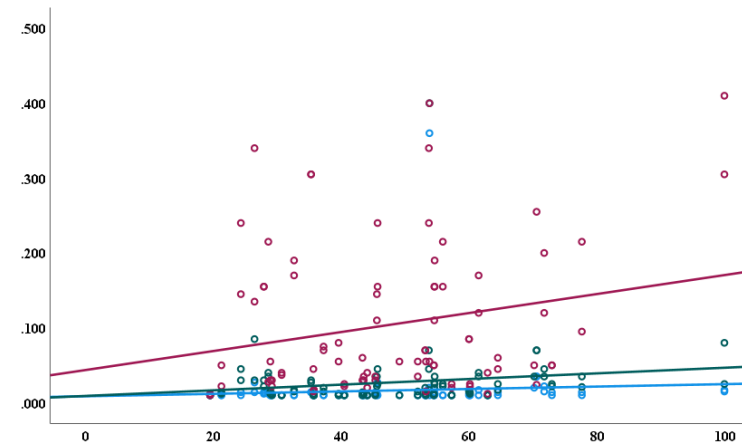

**B) group 20-35 y.**

Basal, with glare

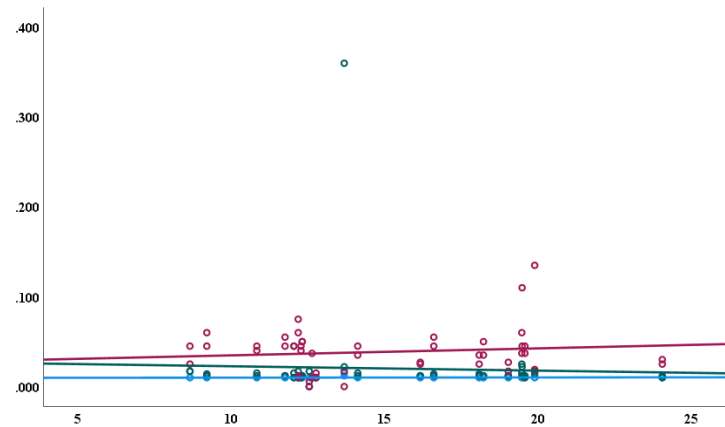

60 d, with glare

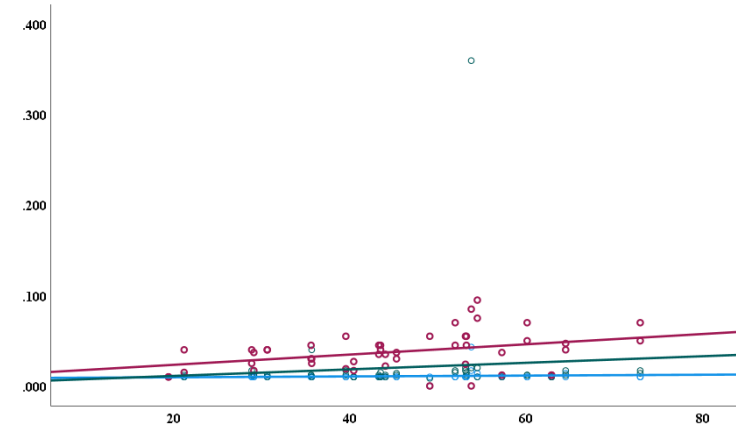

Basal, without glare

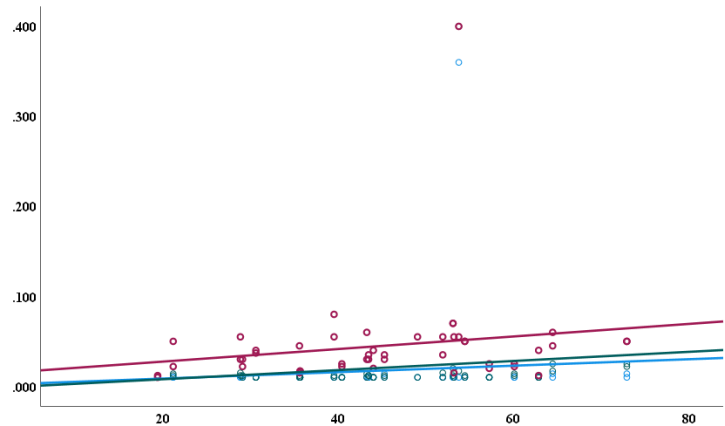

60 d, without glare

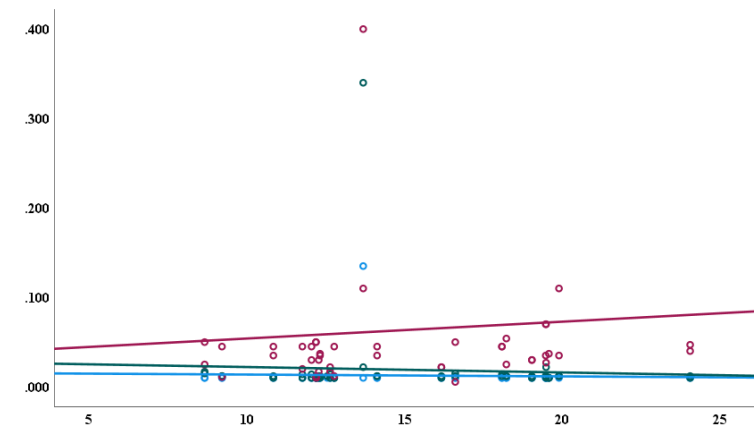

### C) group 50 – 65 y.

Basal, with glare

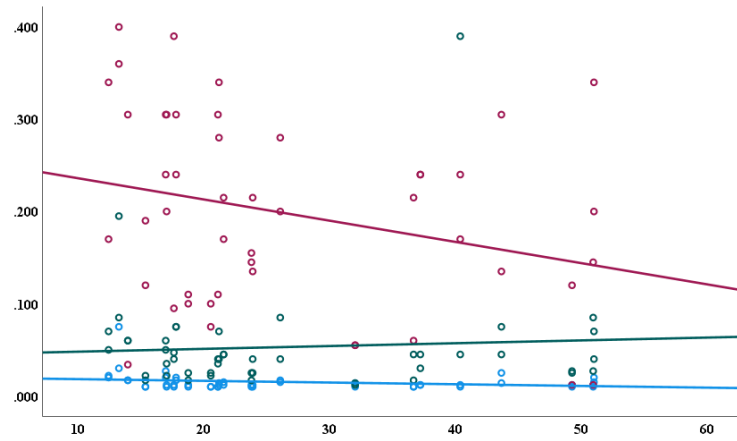

60 d, with glare

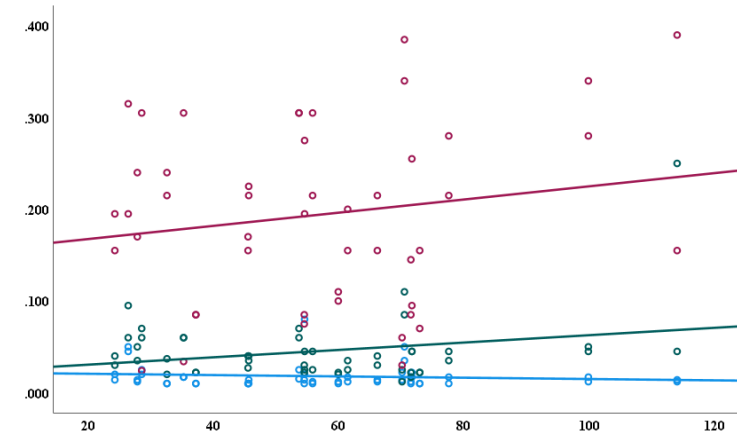

Basal, without glare

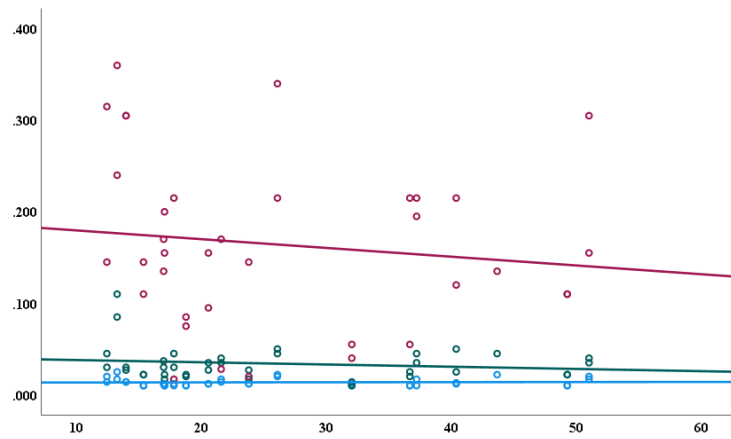

60 d, without glare

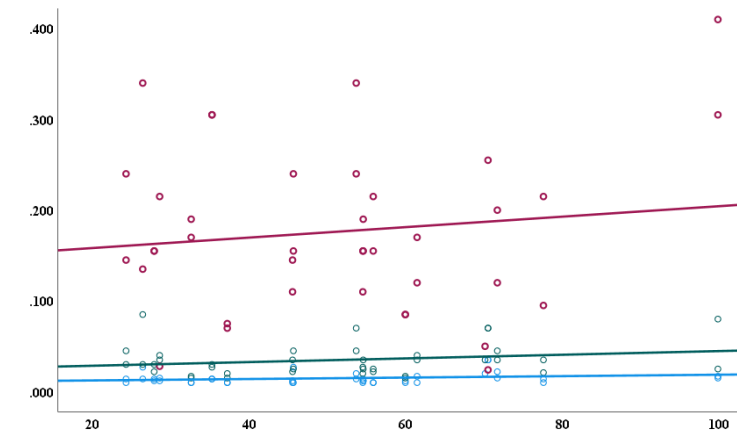

Supplement: s1 [file s1]
